# Supplementary material
Source: publisher figshare collection journal article supplement (https://acs.figshare.com/ndownloader/files/21809880)
Supplement: Supplementary file 1 [file 21809880]

## Supplementary Data

### **Pharmacokinetic/pharmacodynamic modeling to predict antiplatelet effect of ticagrelor-loaded self-microemulsifying drug delivery system in rats**

*Young-Guk Na,<sup>†,‡</sup> Jin-Ju Byeon,<sup>†,‡</sup> Min-Ki Kim,<sup>†</sup> Min-Gu Han,<sup>†</sup> Cheong-Weon Cho,<sup>†</sup> Jong-Suep Baek,<sup>\*,§</sup> Hong-Ki Lee,<sup>\*,†</sup> Young G Shin,<sup>\*,†</sup>*

<sup>†</sup>College of Pharmacy, Chungnam National University, 99 Daehak-ro, Yuseong-gu, Daejeon 34134, Republic of Korea

<sup>§</sup>Department of Herbal Medicine Resource, Kangwon National University, 346 Hwangjo-gil, Dogye-eup, Samcheok-si, Gangwon-do 25949, Republic of Korea

<sup>‡</sup>These authors contributed equally.

\*Correspondence: Jong-Suep Baek, College of Pharmacy, Department of Herbal Medicine Resource, Kangwon National University, 346 Hwangjo-gil, Dogye-eup, Samcheok-si, Gangwon-do 25949, Republic of Korea

E-mail: jsbaek@kangwon.ac.kr. Tel: +82-33-540-3320. Fax: +82-33-540-3329

\*Co-correspondence: Hong-Ki Lee, College of Pharmacy, Chungnam National University, 99 Daehak-ro, Yuseong-gu, Daejeon 34134, Republic of Korea

E-mail: hk\_lee@cnu.ac.kr. Tel: +82-42-821-7301. Fax: +82-42-823-6566

\*Co-correspondence: Young G Shin, College of Pharmacy, Chungnam National University, 99 Daehak-ro, Yuseong-gu, Daejeon 34134, Republic of Korea

E-mail: yshin@cnu.ac.kr. Tel: +82-42-821-5931. Fax: +82-42-823-6566

## 1. Supplementary methods

### 1.1. LC-MS/MS analysis of TCG

The concentrations of TCG were determined using a liquid chromatography tandem-mass spectrometry (LC-MS/MS) system consisting of Agilent 1290 series and Agilent 6495 Triple Quad LC/MS (Agilent Technologies, Santa Clara, CA, USA). A YMC-Triart C18 column (50 × 2.0 mm, 1.9 μm; YMC Inc., Wilmington, NC, USA) was used as a chromatographic column. The mobile phase consisted of solvent A (0.1% formic acid in distilled water) and solvent B (0.1% formic acid in acetonitrile), with a gradient elution (0–0.5 min, 10% solvent B; 0.5–1.0 min, 10% to 95% solvent B; 1.0–1.5 min, 95% solvent B; 1.5–1.6 min, 95 to 10% solvent B; 1.6–3.0 min, 10% solvent B). The flow rate was 0.4 mL/min and the injection volume was 10 μL. The temperature of the column and autosampler were set as 30 °C and 4 °C, respectively. The positive ion mode using Agilent jet stream electrospray ionization (AJS-ESI) was applied to record the scan mass spectra. The ion transitions of TCG and verapamil (ISTD) were set as 523.1→153.0 m/z and 455.3→165.1 m/z, respectively, and detected with a multiple reaction monitoring (MRM) mode. The collision energies for TCG and ISTD were 40 V and 30 V, respectively. The cell accelerator voltage was 5 V and the dwell time was set as 200 ms. The source parameters were set as follows: Gas temperature 200°C, gas flow 14 L/min, nebulizer 20 psi, sheath gas heater 250°C, sheath gas flow 11 L/min, capillary 3000 V, and nozzle voltage 1500 V.

In this analysis, the most abundant ion transition of TCG (523.1→153.0 m/z) was selected to determine the lowest limit of quantification (LLOQ), and the LLOQ of TCG was 3 ng/mL. The range of calibration curve of TCG was set to 3–6600 ng/mL. The curve was written with a weighted linear regression ( $1/x^2$ ) and showed excellent linearity with  $R^2 > 0.999$ . The method has shown accurate and reproducible results within acceptable tolerances (less than 20% coefficient of variation (CV) at LLOQ and less than 15% CV at all other concentrations). The acquired LC-MS/MS data were processed with Agilent analysis software (Agilent MassHunter Quantitative Software Version B.07.00).

## 2. Supplementary results

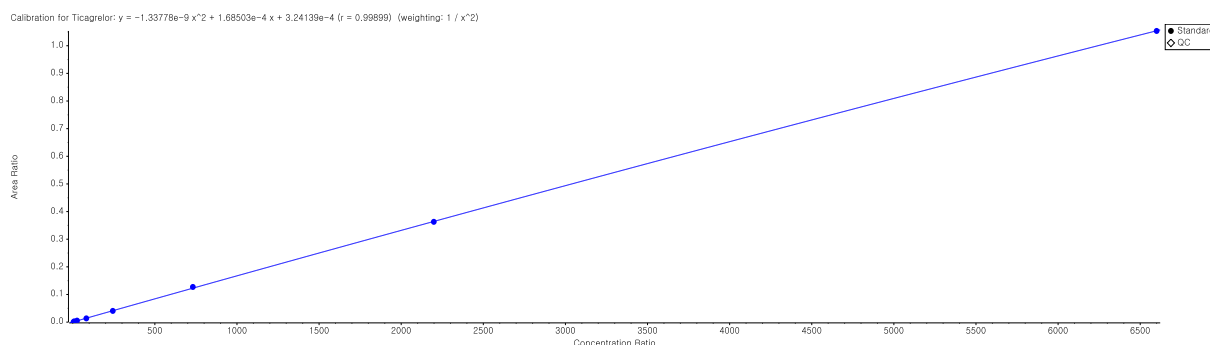

**Figure S1.** Calibration curve of ticagrelor (concentration range 3–6600 ng/mL).

**Table S1.** Ticagrelor concentration in standard samples measured by LC-MS/MS analysis.

| Actual concentration<br>(ng/mL) | Area  | Calculated concentration<br>(ng/mL) | Accuracy<br>(%) |
|---------------------------------|-------|-------------------------------------|-----------------|
| 3.02                            | 39.65 | 3.09                                | 102.19          |
| 9.05                            | 87.55 | 8.35                                | 92..23          |
| 27.16                           | 265.3 | 27.76                               | 102.19          |
| 81.48                           | 805.3 | 85.72                               | 105.20          |
| 244.44                          | 2114  | 34.90                               | 96.10           |
| 733.33                          | 6044  | 752.45                              | 102.61          |
| 2200                            | 18140 | 2189.89                             | 99.54           |
| 6600                            | 55180 | 6595.73                             | 99.94           |

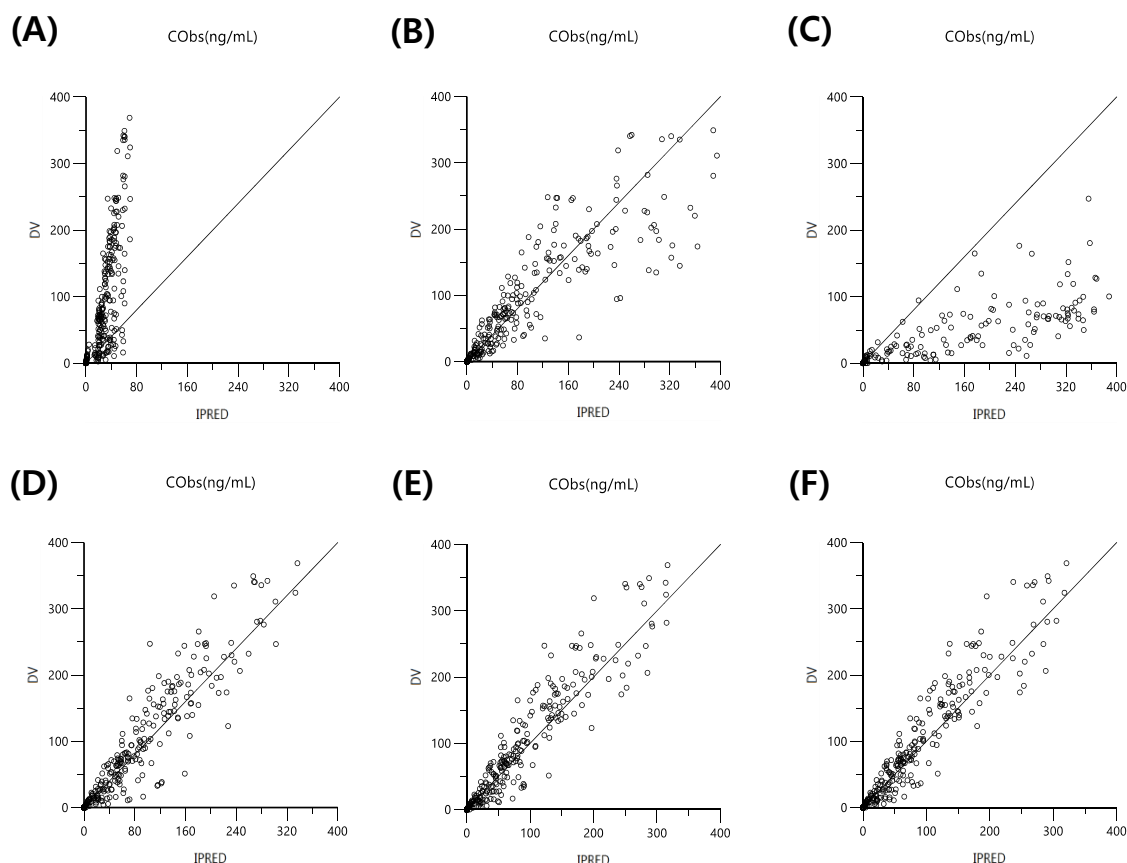

**Figure S2.** Goodness-of-fit plots of (A) one-compartment model with saturated absorption, (B) one-compartment model with multi-absorption compartments, (C) one-compartment model with saturated elimination, (D) one-compartment model with linear-decreased F value, (E) two-compartment model, and (F) one-compartment model. The dotted marks indicate the observed data. The solid line represents the line of unity.

**Table S2.** Objective function values (OFV) from different PK models.

| PK models                                                | OFV (-2LL) |
|----------------------------------------------------------|------------|
| One-compartment model with saturated absorption          | 2512.32    |
| One-compartment model with multi-absorption compartments | 2417.01    |
| One-compartment model with saturated elimination         | 2900.25    |
| One-compartment model with linear-decreased F value      | 2402.75    |
| Two-compartment model                                    | 2277.95    |
| One-compartment model                                    | 2395.59    |

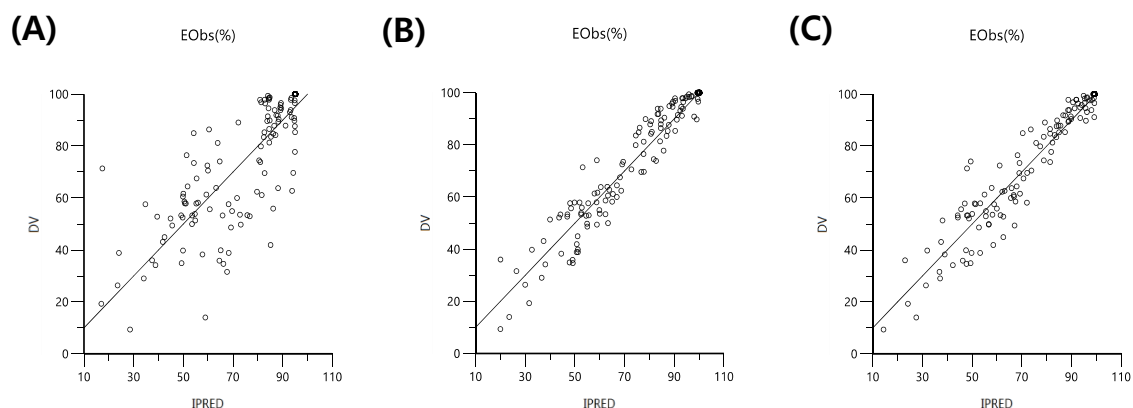

**Figure S3.** Goodness-of-fit plots of (A) direct response  $E_{\max}$  model, (B) effect compartment model, and (C) indirect response  $E_{\max}$  model. The dotted marks indicate the observed data. The solid line represents the line of unity.

**Table S3.** Objective function values (OFV) from different PK/PD models.

| PK/PD models                       | OFV (-2LL) |
|------------------------------------|------------|
| Direct response $E_{\max}$ model   | 1327.67    |
| Effect compartment model           | 1174.58    |
| Indirect response $E_{\max}$ model | 1182.10    |

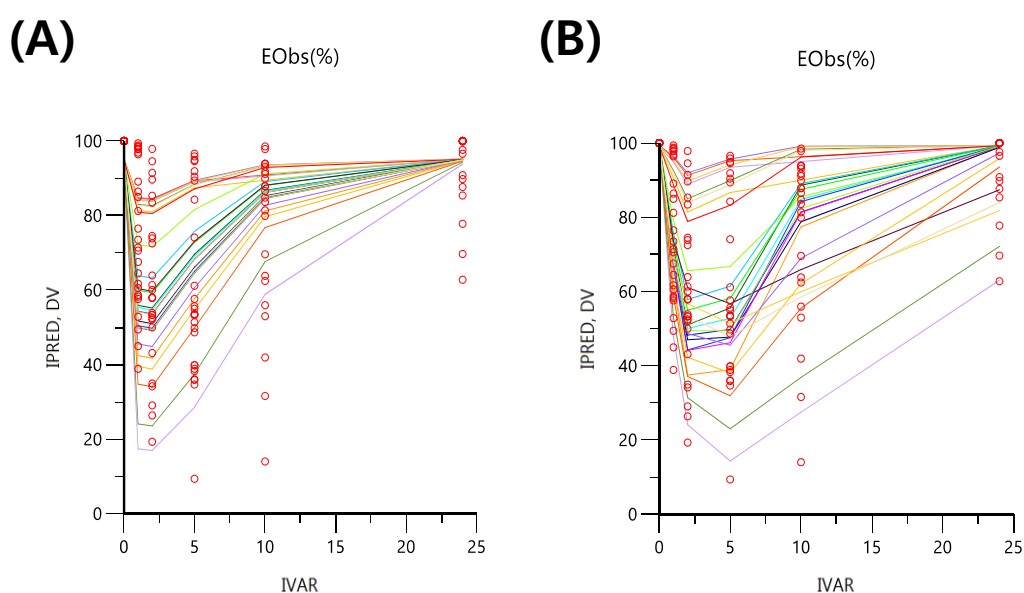

**Figure S4.** Observed data and model-simulated data by (A) effect compartment model and (B) indirect response  $E_{\max}$  model. The dotted marks and solid lines represent the observed data and the simulated profiles, respectively.

- **Results:** The effect compartment model showed lowest OFV, but the model could not reflect the  $I_{\max}$  and the observed effect at 10 h. So, we selected the two-compartment model as a final population PK model.
